# Supplementary material for: Computer-Based Simulators in Pharmacy Practice Education: A Systematic Narrative Review
Source: MDPI journal article supplement (doi:10.3390/pharmacy11010008), 2023-01-02
Supplement: s1 [file s1]

## Supplementary material

**Table S1.** *Characteristics of the included studies*

| Study<br>(Authors and<br>year)                                  | Country | Study Focus                                                                                                                                    | Data collection<br>methods/<br>Evaluation<br>methods                                                                                                                         | Participants                                         | Computer-based<br>simulation<br>platform                                                                                                 | Features                                                                                                                     |
|-----------------------------------------------------------------|---------|------------------------------------------------------------------------------------------------------------------------------------------------|------------------------------------------------------------------------------------------------------------------------------------------------------------------------------|------------------------------------------------------|------------------------------------------------------------------------------------------------------------------------------------------|------------------------------------------------------------------------------------------------------------------------------|
| Al-Dahir,<br>Bryant,<br>Kennedy, &<br>Robinson,<br>2014<br>[51] | USA     | To evaluate<br>computer<br>simulator as a<br>learning method                                                                                   | Knowledge-based<br>pre-post- Multiple-<br>choice questions<br>(MCQs)<br><br>Evaluative survey -<br>Likert scale                                                              | Pharmacy<br>undergraduate<br>s at one<br>university. |                                                                                                                                          |                                                                                                                              |
| Neal Benedict,<br>2010<br>[36]                                  | USA     | Incorporating<br>effective<br>and active-<br>learning<br>strategies                                                                            | Knowledge based<br>questions.<br><br>SOAP (Subjective-<br>objective<br>assessment-plan).<br><br>Post course<br>evaluative survey                                             | Pharmacy<br>undergraduate<br>s at one<br>university. |                                                                                                                                          | Automated<br>marking/grading<br><br>Immediate detailed<br>feedback                                                           |
| Benedict,<br>Schonder, &<br>McGee, 2013<br>[28]                 | USA     | To assess the<br>effectiveness of<br>computer<br>simulation and<br>promote self-<br>directed learning                                          | Pre and post<br>knowledge<br>quiz<br><br>Final exam scores<br><br>Post-course<br>evaluative survey<br>(Likert scale)                                                         | Pharmacy<br>undergraduate<br>s at one<br>university  | DecisionSim<br>(Formerly vpSim)<br><br><a href="https://www.kynektiv.com/platform">https://www.kynektiv.com/platform</a><br><br>(Active) | Single user<br><br>Different setting<br>environment<br>(Pharmacy +<br>Interdisciplinary)<br><br>Support sharing<br>scenarios |
| Lichvar et al.,<br>2016<br>[66]                                 | USA     | To design and<br>evaluate the<br>integration of a<br>virtual patient<br>activity<br>And study an<br>effective active-<br>learning<br>strategy. | Pre and post<br>knowledge<br>quiz<br><br>End-of-year exam<br>(To assess<br>knowledge<br>retention)<br><br>evaluative survey<br>(Likert scale and<br>open-ended<br>questions) | Pharmacy<br>undergraduate<br>s at one<br>university. |                                                                                                                                          | Video, Audio, and<br>Imagery<br>(Web-based)                                                                                  |
| Olin & Cole,<br>2015<br>[55]                                    | USA     | To describe<br>computer-based<br>clinical                                                                                                      | Evaluative survey<br>(Likert scale)                                                                                                                                          | Pharmacy<br>undergraduate                            |                                                                                                                                          |                                                                                                                              |

|                                                             |           |                                                                                           |                                                                                                                                                                                                 |                                                          |                                                                                                   |                                                                                 |
|-------------------------------------------------------------|-----------|-------------------------------------------------------------------------------------------|-------------------------------------------------------------------------------------------------------------------------------------------------------------------------------------------------|----------------------------------------------------------|---------------------------------------------------------------------------------------------------|---------------------------------------------------------------------------------|
|                                                             |           | simulation cases (CBCSCs) and review student perceptions of this learning strategy.       |                                                                                                                                                                                                 | s at two campuses                                        |                                                                                                   |                                                                                 |
| Michael A. Smith, Mohammad, & Benedict, 2014 [4]            | USA       | To assess student satisfaction and learning of course objectives                          | The post-course survey, and a pre-simulation and post-simulation tests were used to assess student learning                                                                                     | Pharmacy undergraduate s at one university               |                                                                                                   |                                                                                 |
| Michael A. Smith, Siemianowski, & Benedict, 2016 [29]       | USA       | To expand the use of virtual patients by sharing case scenarios across two schools        | Pre and post-tests assessed student learning, data collected regarding the development and sharing of cases and the survey was conducted to measure faculty perception and student satisfaction | Pharmacy undergraduate s and 3 educators at two schools. |                                                                                                   |                                                                                 |
| Ambroziak, Ibrahim, Marshall, & Kelling, 2018 [12]          | USA       | To evaluate a computer simulator and assess the dispensing knowledge                      | Post-course survey (with open and closed-ended questions)                                                                                                                                       | Pharmacy undergraduate s at one university.              |                                                                                                   | Automated marking/grading                                                       |
| Ferrone, Kebodeaux, Fitzgerald, & Holle, 2017 [41].         | USA       | To evaluate computer simulator and assess the dispensing knowledge and student perception | post-simulation survey, (Likert scale and open-ended questions)                                                                                                                                 | Pharmacy undergraduate s at three Universities           | MyDispense                                                                                        | Immediate detailed feedback<br>Single user<br>One pharmacy setting              |
| Mak, Fitzgerald, Holle, Vordenberg, & Kebodeaux, 2021 [11]. | Australia | Improve student learning                                                                  | A commentary from authors and developers of the tool to share suggestions for using "MyDispense" in the didactic and experiential settings to meet                                              | Pharmacy undergraduate s                                 | <a href="https://info.mydispense.monash.edu/">https://info.mydispense.monash.edu/</a><br>(Active) | Support sharing scenarios<br>Static images, Text, and Patient notes (Web-based) |

| educational outcomes and the challenges of virtual simulation.                                                                                            |                              |                                                                                                  |                                                                                                                                                                            |                                                                                            |                                                                                                                         |                                                                                                                                                                            |
|-----------------------------------------------------------------------------------------------------------------------------------------------------------|------------------------------|--------------------------------------------------------------------------------------------------|----------------------------------------------------------------------------------------------------------------------------------------------------------------------------|--------------------------------------------------------------------------------------------|-------------------------------------------------------------------------------------------------------------------------|----------------------------------------------------------------------------------------------------------------------------------------------------------------------------|
| McDowell, Jenny<br>Styles, Kim<br>Sewell, Keith<br>Trinder, Peta<br>Marriott, Jennifer<br>Maher, Sheryl<br>Naidu, Som,<br>2016<br>[54].                   | Australia                    | To develop and evaluate a computer simulator and assess student knowledge.                       | Analysis of student examination results and post-course survey.                                                                                                            | Pharmacy undergraduates at one university.                                                 |                                                                                                                         |                                                                                                                                                                            |
| Shin, Tabatabai, Boscardin, Ferrone, & Brock, 2018<br>[43]                                                                                                | USA                          | To demonstrate the feasibility of integrating computer simulation and assess student perceptions | pre- and post-tests in class and three surveys (for each phase and overall experience)                                                                                     | Pharmacy undergraduates at one university                                                  |                                                                                                                         |                                                                                                                                                                            |
| Tai, Ming-Hei<br>Rida, Nada<br>Klein, Kristin C<br>Diez, Heidi<br>Wells, Trisha<br>Kippes, Kellie<br>Walker, Paul C<br>Vordenberg, Sarah E, 2020<br>[21]. | USA                          | Assess student perception and knowledge in introductory pharmacy practice experiences (IPPEs)    | Post-course surveys were conducted by students. Also, preceptors were asked to complete a survey.                                                                          | Pharmacy undergraduates and preceptors at one university                                   |                                                                                                                         |                                                                                                                                                                            |
| Richardson, Chapman, & White, 2019<br>[59].                                                                                                               | different European countries | To develop and show proof of concept of the computer-based simulation.                           | a blend of formal meetings, distance evaluation (Using formal forms and email feedback).<br><br>Evaluation forms were a mixture of quantitative and qualitative questions. | A steering group of European pharmacists provided data for computer simulation development | Keele virtual patient (Keele University)<br><a href="https://www.keelevp.com/">https://www.keelevp.com/</a><br>(Active) | Grading was not offered (but suggested by users)<br><br>Immediate detailed feedback<br><br>Single user<br><br>Different setting environment (Pharmacy + Interdisciplinary) |

|                                                                                                                                                                       |             |                                                                                                                                  |                                                                                                                                                |                                                             |                                                                                                                                                                                   |
|-----------------------------------------------------------------------------------------------------------------------------------------------------------------------|-------------|----------------------------------------------------------------------------------------------------------------------------------|------------------------------------------------------------------------------------------------------------------------------------------------|-------------------------------------------------------------|-----------------------------------------------------------------------------------------------------------------------------------------------------------------------------------|
| Thompson, Jessica<br>White, Simon<br>Chapman, Stephen, 2020<br>[13].                                                                                                  | UK          | To evaluate perceptions on the integration of computer simulator.                                                                | Telephone interviews (Semi-structured) to discuss the students' perspectives on the use of the virtual patient or non-interactive case studies | Pharmacy undergraduate (pre-registration) at one university | Support sharing scenarios                                                                                                                                                         |
| Thompson, Jessica<br>White, S.<br>Chapman, S., 2020<br>[44].                                                                                                          | UK          | To evaluate virtual patient (VP) and non-interactive (NI) case studies, concerning knowledge, skill, and confidence development. | Pre- and post-knowledge quiz.<br><br>questionnaire (Likert scale and open-ended questions).                                                    | Pharmacy students (preregistered) at one university         | Interactive animated avatar, Embedded voice and Dynamic emotions, Patient notes and Dialogue choices options                                                                      |
| Bracegirdle & Chapman, 2010<br>[58].                                                                                                                                  | UK          | To demonstrate the computer simulator design and report the integration experience                                               | collective feedback                                                                                                                            | Pharmacy undergraduates at one university                   |                                                                                                                                                                                   |
| S. B. Duffull & Peterson, 2020<br>[57].                                                                                                                               | New Zealand | to evaluate students' perceptions using the computer simulation                                                                  | Post-course evaluative survey. (Likert scale)                                                                                                  | Pharmacy undergraduates at one university                   | Automated grading<br><br>Immediate feedback                                                                                                                                       |
| Duffull, Stephen.<br>Peterson, A. K.<br>Chai, Bill<br>Cho, Frasier<br>Opoku, Justice<br>Sissing, Tasia<br>Smith, Daniel<br>Tongskul, Tran<br>Wilby, K., 2020<br>[56]. | New Zealand | To evaluate the use of the computer simulation in interprofessional education (IPE)                                              | A post-course questionnaire, an interview, and a review of students' SimPHARM log files.                                                       | -Medical and pharmacy undergraduates at one university.     | SimPharm<br><br><a href="https://www.simpharm.com/">https://www.simpharm.com/</a><br><br>(Active)                                                                                 |
| Loke, Swee-Kin                                                                                                                                                        | New Zealand | To evaluate the learning method                                                                                                  | Audio recordings and                                                                                                                           | Pharmacy undergraduate                                      | Single user<br><br>Different setting environment (Pharmacy + Interdisciplinary)<br><br>Support sharing scenarios<br><br>Static images, Audio, Text, and Patient notes (Web-based) |

|                                                                                                                                                         |                |                                                                                  |                                                                                                                                                                                           |                                                       |                                                                                                                                               |                                                                                                                                                                                                        |
|---------------------------------------------------------------------------------------------------------------------------------------------------------|----------------|----------------------------------------------------------------------------------|-------------------------------------------------------------------------------------------------------------------------------------------------------------------------------------------|-------------------------------------------------------|-----------------------------------------------------------------------------------------------------------------------------------------------|--------------------------------------------------------------------------------------------------------------------------------------------------------------------------------------------------------|
| Tordoff, June<br>Winikoff,<br>Michael<br>McDonald,<br>Jenny<br>Vlugter, Peter<br>Duffull,<br>Stephen, 2010<br>[32]                                      |                | using a<br>computer<br>simulator and<br>students'<br>perception                  | observations in<br>class<br>Focus groups                                                                                                                                                  | s at one<br>university.                               |                                                                                                                                               |                                                                                                                                                                                                        |
| Wright,<br>Daniel F. B.<br>Duffull,<br>Stephen B.<br>Wilby, Kyle J.<br>Peterson,<br>Aynsley K.<br>Anakin,<br>Megan G.,<br>2020<br>[45].                 | New<br>Zealand | To evaluate<br>knowledge and<br>skills delivered<br>by the computer<br>simulator | A pre-and post-<br>intervention<br>crossover study<br>design                                                                                                                              | Practising<br>pharmacists.                            |                                                                                                                                               |                                                                                                                                                                                                        |
| Bravo, Marie<br>Jam<br>So, Miranda<br>Natsheh,<br>Cindy<br>Tait, Gordon<br>Austin, Zubin<br>Cameron,<br>Karen., 2019<br>[60].                           | Canada         | To assess<br>students'<br>perceptions<br>using a<br>computer<br>simulation       | a semi-structured<br>interview<br>conducted by<br>VIC's project team<br>members.<br><br>The interviews<br>were audio-<br>recorded,<br>transcribed, and<br>coded for<br>extracting themes. | Pharmacy<br>undergraduate<br>s from one<br>university | Virtual<br>Interactive Case<br>System                                                                                                         | Automated<br>marking/grading<br><br>Immediate detailed<br>feedback<br><br>Single user<br><br>Different setting<br>environment<br>(Pharmacy +<br>Interdisciplinary)<br><br>Support sharing<br>scenarios |
| Dahri, Karen<br>MacNeil,<br>Kimberley<br>Chan, Fong<br>Lamoureux,<br>Emilie<br>Bakker, Mattie<br>Seto,<br>Katherine<br>Yeung,<br>Janice., 2019<br>[35]. | Canada         | To investigate<br>students'<br>perceptions<br>towards<br>computer<br>simulation  | Post-course survey<br>and focus group<br>participation                                                                                                                                    | Pharmacy<br>undergraduate<br>s at one<br>university   | <a href="http://pie.med.utoronto.ca/VIC/VIC_content/VIC_pharm.html">http://pie.med.utoronto.ca/VIC/VIC_content/VIC_pharm.html</a><br>(Active) | Static image and Text<br>With limited choices<br>option<br>(Web-based form)                                                                                                                            |
| Bindoff, Ivan<br>Ling, Tristan                                                                                                                          | Australia      | To present and<br>evaluate the<br>computer                                       | Pre and post<br>knowledge<br>quiz                                                                                                                                                         | Pharmacy<br>undergraduate                             | Pharmacy<br>Simulator                                                                                                                         | Automated<br>marking/grading                                                                                                                                                                           |

|                                                                                                                    |           |                                                                      |                                                                                                                  |                                                  |                                                                                  |                                                                                                                                                                                                                               |
|--------------------------------------------------------------------------------------------------------------------|-----------|----------------------------------------------------------------------|------------------------------------------------------------------------------------------------------------------|--------------------------------------------------|----------------------------------------------------------------------------------|-------------------------------------------------------------------------------------------------------------------------------------------------------------------------------------------------------------------------------|
| Bereznicki, Luke Westbury, Juanita Chalmers, Leanne Peterson, Gregory Ollington, Robert., 2014 [16].               |           | simulator's effectiveness and actively engaging learning experience  | Evaluative survey (Likert scale and open-ended questions)                                                        | s from one university                            | <a href="https://www.pharmacysim.com/">https://www.pharmacysim.com/</a> (Active) | Immediate detailed feedback<br>Single user<br>In more than one pharmacy setting<br>Support sharing scenarios<br>Interactive animated avatars, Embedded voice and Dynamic emotions, Patient notes and Dialogue choices options |
| Tait, Lauren Lee, Kenneth Rasiah, Rohan Cooper, Joyce M. Ling, Tristan Geelan, Benjamin Bindoff, Ivan., 2018 [67]. | Australia | To investigate perception and experience using computer simulation   | A post-simulation questionnaire.                                                                                 | Master of Pharmacy students at one university    |                                                                                  |                                                                                                                                                                                                                               |
| Zary, Johnson, Boberg, & Fors, 2006 [38].                                                                          | Sweden    | To evaluate a computer simulator                                     | Post-course surveys and on-site observations were performed when possible. (Likert scale and free text Comments) | Medicine, dental and pharmacy undergraduates     | Web-based Simulation of Patients (Web-SP).                                       | Automated marking/grading<br>Immediate detailed feedback<br>Single user<br>Different setting environment (Pharmacy + Interdisciplinary)<br>Support sharing scenarios<br>Video, Audio, and Imagery and/or free text input.     |
| J. L. Marriott, 2007 [52].                                                                                         | Australia | To assess and evaluate a computer simulator's use as a learning tool | Post-assessment survey) to determine the                                                                         | Pharmacy undergraduates at one School/University | A purpose-designed computer program                                              | No marking/grading<br>Delayed detailed feedback                                                                                                                                                                               |

|                                                  |           |                                                                                                |                                                                                                           |                                                                        |                                     |
|--------------------------------------------------|-----------|------------------------------------------------------------------------------------------------|-----------------------------------------------------------------------------------------------------------|------------------------------------------------------------------------|-------------------------------------|
|                                                  |           | program's ease of use and its perceived value.                                                 |                                                                                                           | Single user                                                            |                                     |
|                                                  |           |                                                                                                |                                                                                                           | Different setting environment (Pharmacy + Interdisciplinary)           |                                     |
| J. L. Marriott, 2007 [53].                       | Australia | To assess and evaluate a computer simulator's use as a learning tool                           | Review of the software design, features, and functions                                                    | Pharmacy undergraduates at one School/University                       | Shareable scenarios: no information |
|                                                  |           |                                                                                                |                                                                                                           | Preselected options and/or text.                                       |                                     |
|                                                  |           |                                                                                                |                                                                                                           | Need faculty marking/grading                                           |                                     |
|                                                  |           |                                                                                                |                                                                                                           | Immediate detailed feedback                                            |                                     |
|                                                  |           |                                                                                                |                                                                                                           | Multiple users                                                         |                                     |
| Caylor, Aebersold, Lapham, & Carlson, 2015 [40]. | USA       | to examine the use and effectiveness of the computer simulation in multi-professional learning | Pre and post teamwork Questionnaire (Likert scale)<br>Team Performance Observation Tool – Faculty members | Undergraduates from nursing, medicine, and pharmacy at same University | Second Life                         |
|                                                  |           |                                                                                                |                                                                                                           | Different setting environment (Pharmacy + Interdisciplinary)           |                                     |
|                                                  |           |                                                                                                |                                                                                                           | Shareable scenarios – not supported                                    |                                     |
|                                                  |           |                                                                                                |                                                                                                           | Animation based and voice discussion through avatars                   |                                     |
|                                                  |           |                                                                                                |                                                                                                           | Automated marking/grading                                              |                                     |
|                                                  |           |                                                                                                |                                                                                                           | Immediate detailed feedback                                            |                                     |
|                                                  |           |                                                                                                |                                                                                                           | Single user                                                            |                                     |
| Benedict & Schonder, 2011 [15].                  | USA       | To implement and assess the effectiveness of a computer simulation in teaching                 | Pre and post knowledge quiz<br>Final exam scores                                                          | Pharmacy undergraduates from one university                            | PharmaCAL                           |
|                                                  |           |                                                                                                |                                                                                                           | In one pharmacy setting                                                |                                     |
|                                                  |           |                                                                                                |                                                                                                           | Sharing scenarios – not supported                                      |                                     |
|                                                  |           |                                                                                                |                                                                                                           | - Development: University developed                                    |                                     |
|                                                  |           |                                                                                                |                                                                                                           | - Output: No info                                                      |                                     |
|                                                  |           |                                                                                                |                                                                                                           | - Input: Preselected options.                                          |                                     |



|                                                 |     |                                                                                             |                                                                                                                                                                                                         |                                                                   |                                                                                               |                                                   |
|-------------------------------------------------|-----|---------------------------------------------------------------------------------------------|---------------------------------------------------------------------------------------------------------------------------------------------------------------------------------------------------------|-------------------------------------------------------------------|-----------------------------------------------------------------------------------------------|---------------------------------------------------|
| Douglass, Casale, Skirvin, & DiVall, 2013 [68]. | USA | To implement and assess the impact of computer simulation on students' knowledge and skills | Pre and post-test for evaluating clinical competence                                                                                                                                                    | Pharmacy undergraduates at one university.                        | TheraSim                                                                                      | Automated marking/grading                         |
|                                                 |     |                                                                                             |                                                                                                                                                                                                         |                                                                   |                                                                                               | Immediate detailed feedback                       |
|                                                 |     |                                                                                             |                                                                                                                                                                                                         |                                                                   |                                                                                               | Single user                                       |
|                                                 |     |                                                                                             |                                                                                                                                                                                                         |                                                                   |                                                                                               | In one pharmacy setting                           |
|                                                 |     |                                                                                             |                                                                                                                                                                                                         |                                                                   |                                                                                               | Support sharing scenarios                         |
| Fuhrman, Buff, Eaddy, & Dollar, 2001 [63].      | USA | To present and implement a virtual patient database in teaching continuity of care          | Students graded on their responses Knowledge exam. Post-course evaluative survey. (Likert scale)                                                                                                        | Pharmacy undergraduates at one university                         | Virtual Family                                                                                | Video, Audio, and Imagery and preselected options |
|                                                 |     |                                                                                             |                                                                                                                                                                                                         |                                                                   |                                                                                               | Need faculty marking/grading                      |
|                                                 |     |                                                                                             |                                                                                                                                                                                                         |                                                                   |                                                                                               | Immediate detailed feedback                       |
|                                                 |     |                                                                                             |                                                                                                                                                                                                         |                                                                   |                                                                                               | Multiple users                                    |
|                                                 |     |                                                                                             |                                                                                                                                                                                                         |                                                                   |                                                                                               | In one pharmacy setting                           |
| Hussein & Kawahara, 2006 [47].                  | USA | To promote active learning and knowledge                                                    | Knowledge assessed based on<br>1) the care plan and messages left on the telephone<br>2) Final knowledge exam<br>Also, Educators' evaluative Survey. (Likert scale)<br><br>Students' evaluative Survey. | Pharmacy undergraduates and six faculty members at one university | Computer telephony interactive voice response system (IVR) and a text-to-speech (TTS) system. | Sharing scenarios – not supported                 |
|                                                 |     |                                                                                             |                                                                                                                                                                                                         |                                                                   |                                                                                               | Text-based                                        |
|                                                 |     |                                                                                             |                                                                                                                                                                                                         |                                                                   |                                                                                               | Need faculty marking/grading                      |
|                                                 |     |                                                                                             |                                                                                                                                                                                                         |                                                                   |                                                                                               | Delayed detailed feedback                         |
|                                                 |     |                                                                                             |                                                                                                                                                                                                         |                                                                   |                                                                                               | Single user                                       |
|                                                 |     |                                                                                             |                                                                                                                                                                                                         |                                                                   |                                                                                               | In one pharmacy setting                           |
|                                                 |     |                                                                                             |                                                                                                                                                                                                         |                                                                   |                                                                                               | Sharing scenarios – not supported                 |
|                                                 |     |                                                                                             |                                                                                                                                                                                                         |                                                                   |                                                                                               | Voice- telephone-based and Text-based             |



|                                             |           |                                                                                               |                                                                                                                                                                                                                  |                                               |                              |                                   |                                                                       |
|---------------------------------------------|-----------|-----------------------------------------------------------------------------------------------|------------------------------------------------------------------------------------------------------------------------------------------------------------------------------------------------------------------|-----------------------------------------------|------------------------------|-----------------------------------|-----------------------------------------------------------------------|
|                                             |           |                                                                                               |                                                                                                                                                                                                                  |                                               |                              |                                   | Support sharing scenarios                                             |
|                                             |           |                                                                                               |                                                                                                                                                                                                                  |                                               |                              |                                   | Interactive animated avatar and Preselected options                   |
|                                             |           |                                                                                               |                                                                                                                                                                                                                  |                                               |                              |                                   | Needs faculty marking/grading                                         |
|                                             |           |                                                                                               |                                                                                                                                                                                                                  |                                               |                              |                                   | Delayed detailed feedback                                             |
|                                             |           |                                                                                               |                                                                                                                                                                                                                  |                                               |                              |                                   | Single user                                                           |
| J. Marriott, Styles, & McDowell, 2012 [31]. | Australia | To present a computer simulator and the integration experience within teaching the curriculum | Post-course students' feedback survey for two consecutive years.<br><br>A student focus group discussion was conducted.<br><br>A comprehensive evaluation was undertaken of staff and student use of Pharmville. | Pharmacy undergraduates                       | Pharmville                   | In one pharmacy setting           | Support sharing scenarios                                             |
|                                             |           |                                                                                               |                                                                                                                                                                                                                  |                                               |                              |                                   | Include: Video, Audio, and Imagery (Web-based) and/or free-text input |
|                                             |           |                                                                                               |                                                                                                                                                                                                                  |                                               |                              |                                   | Needs faculty for marking/grading                                     |
|                                             |           |                                                                                               |                                                                                                                                                                                                                  |                                               |                              |                                   | Delayed detailed feedback                                             |
|                                             |           |                                                                                               |                                                                                                                                                                                                                  |                                               |                              |                                   | Single user                                                           |
| Menendez et al., 2015 [39].                 | Brazil    | To present and evaluate computer simulation in teaching                                       | Post-course surveys and on-site observations were performed when possible.                                                                                                                                       | Pharmacy undergraduates at one university.    | PharmaVP                     | In more than one pharmacy setting | Sharing scenarios – not supported                                     |
|                                             |           |                                                                                               |                                                                                                                                                                                                                  |                                               |                              |                                   | Include: Video, Audio, and Imagery (Web-based) and/or free-text input |
|                                             |           |                                                                                               |                                                                                                                                                                                                                  |                                               |                              |                                   | Needs faculty for marking/grading                                     |
| Park & Summons, 2013 [65].                  | Australia | To present a computer simulator and students' perceptions                                     | Evaluative survey – Likert scale                                                                                                                                                                                 | Pharmacy undergraduates at three universities | The Virtual Pharmacy Patient | Delayed detailed feedback         | Single user                                                           |



|                                                               |     |                                                                                       |                                                                                                                                                                                   |                                                          |                                                             |                                          |
|---------------------------------------------------------------|-----|---------------------------------------------------------------------------------------|-----------------------------------------------------------------------------------------------------------------------------------------------------------------------------------|----------------------------------------------------------|-------------------------------------------------------------|------------------------------------------|
| Villaume, Berger, & Barker, 2006 [42].                        | USA | To assess students' knowledge using computer simulation                               | Post assignment survey was conducted to collect feedback regarding students' experiences with the tool.                                                                           | Pharmacy undergraduate s                                 | The Auburn University Virtual Patient (AUPV) simulation.    | Needs faculty marking/grading            |
|                                                               |     |                                                                                       | knowledge test (by number of multiple choice questions (MCQs) as part of the final examination to examine students' knowledge retention and efficiency of incorporating the tool. |                                                          |                                                             | Delayed detailed feedback                |
| Barnett, Gallimore, Pitterle, & Morrill, 2016 [37].           | USA | To evaluate computer simulation vs a paper case on student confidence and engagement. | Students script for VP - graded Final exam – Knowledge retention                                                                                                                  | Pharmacy undergraduate s at one university               | Case Scenario/Critical Reader (CSCR) Builder authoring tool | Single user                              |
|                                                               |     |                                                                                       | Pre- and post-evaluation survey (Likert scale)                                                                                                                                    |                                                          |                                                             | In more than one pharmacy setting        |
| Battaglia, Kieser, Bruskiwitz, Pitterle, & Thorpe, 2012 [50]. | USA | To present the development, implementation, and assess the effectiveness of           | Subjective-objective assessment plan (SOAP)                                                                                                                                       | Pharmacists (42) and pharmacy students at one university | Virtual patient training via the online Moodle platform.    | Sharing scenarios – No information       |
|                                                               |     |                                                                                       | Pre and post assessment (Likert scale, multiple choice questions (MCQs))                                                                                                          |                                                          |                                                             | Video, Audio, and Imagery and Text-based |
|                                                               |     |                                                                                       |                                                                                                                                                                                   |                                                          |                                                             | Needs faculty marking/grading            |
|                                                               |     |                                                                                       |                                                                                                                                                                                   |                                                          |                                                             | Delayed detailed feedback                |

|                                                        |     |                                                                                                   |                                                                                                                                               |                                           |                                                             |                                                    |
|--------------------------------------------------------|-----|---------------------------------------------------------------------------------------------------|-----------------------------------------------------------------------------------------------------------------------------------------------|-------------------------------------------|-------------------------------------------------------------|----------------------------------------------------|
|                                                        |     | computer simulation                                                                               | and short answer questions)                                                                                                                   |                                           |                                                             | (Multiple users)                                   |
|                                                        |     |                                                                                                   |                                                                                                                                               |                                           |                                                             | In diff pharmacy settings + other health education |
|                                                        |     |                                                                                                   |                                                                                                                                               |                                           |                                                             | Support sharing scenarios                          |
|                                                        |     |                                                                                                   |                                                                                                                                               |                                           |                                                             | Text-based                                         |
|                                                        |     |                                                                                                   |                                                                                                                                               |                                           |                                                             | Needs faculty marking/grading                      |
|                                                        |     |                                                                                                   | Pre- and post-surveys                                                                                                                         |                                           |                                                             | Delayed detailed feedback                          |
| Coons, Kobulinsky, Farkas, Lutz, & Seybert, 2018 [69]. | USA | to evaluate the impact of a virtual EHR on learning efficiency                                    | Well as a clinical pharmacy note which summarised a problem list and treatment recommendations.                                               | Pharmacy undergraduates at one university | Virtual EHR/DocuCare                                        | Single user                                        |
|                                                        |     |                                                                                                   |                                                                                                                                               |                                           |                                                             | In diff pharmacy settings + other health education |
|                                                        |     |                                                                                                   |                                                                                                                                               |                                           |                                                             | Support sharing scenarios                          |
|                                                        |     |                                                                                                   |                                                                                                                                               |                                           |                                                             | Preselected options and/or free-text input         |
|                                                        |     |                                                                                                   |                                                                                                                                               |                                           |                                                             | Needs faculty marking/grading                      |
|                                                        |     |                                                                                                   | Pre- and post-activity surveys                                                                                                                |                                           |                                                             | Delayed detailed feedback                          |
|                                                        |     | To measure students' confidence and assess their performance and perception using EHR technology. | As well as performance scores were compared between students that used an EHR vs last year's students who used a paper-based medication form. | pharmacy undergraduates at one university | EHR GO! <a href="https://ehrgo.com/">https://ehrgo.com/</a> | Single and multi-user                              |
| Ives, Tucker, & Trovato, 2020 [70].                    | USA |                                                                                                   |                                                                                                                                               |                                           | <a href="https://ehrgo.com/">https://ehrgo.com/</a>         | In diff pharmacy settings + other health education |
|                                                        |     |                                                                                                   |                                                                                                                                               |                                           | (Active)                                                    | Support sharing scenarios                          |
|                                                        |     |                                                                                                   |                                                                                                                                               |                                           |                                                             | Static images, Text, and Patient notes (Web-based) |

Active: There is an available presence of the simulator's website, which offers new updates and shows specialised interest in Pharmacy education.

Inactive: There is (NO) available presence of the simulator's website or (NO) available updates or shows (NO) specialised interest and/or availability of scenarios focusing on Pharmacy education.
